# Supplementary material for: Predicting epileptic seizures using nonnegative matrix factorization
Source: PubMed Central journal article supplement (PMC7001919; doi:10.1371/journal.pone.0228025), 2020-02-05

Time-frequency model (preictal state)

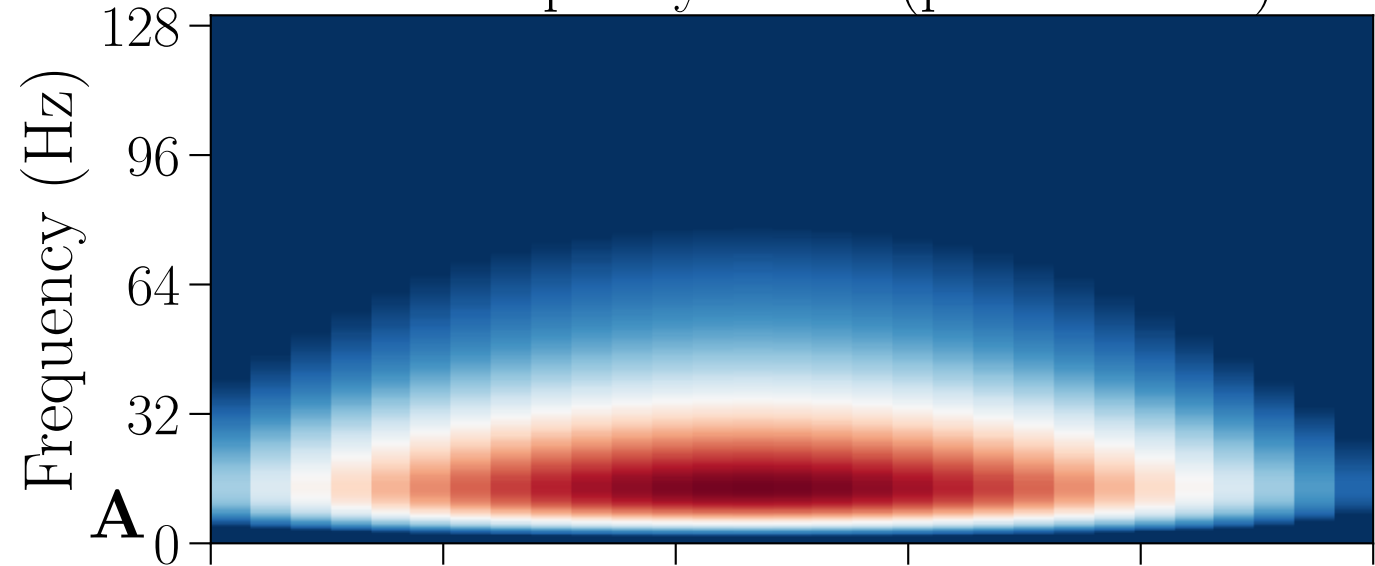

Spectrogram (preictal state)

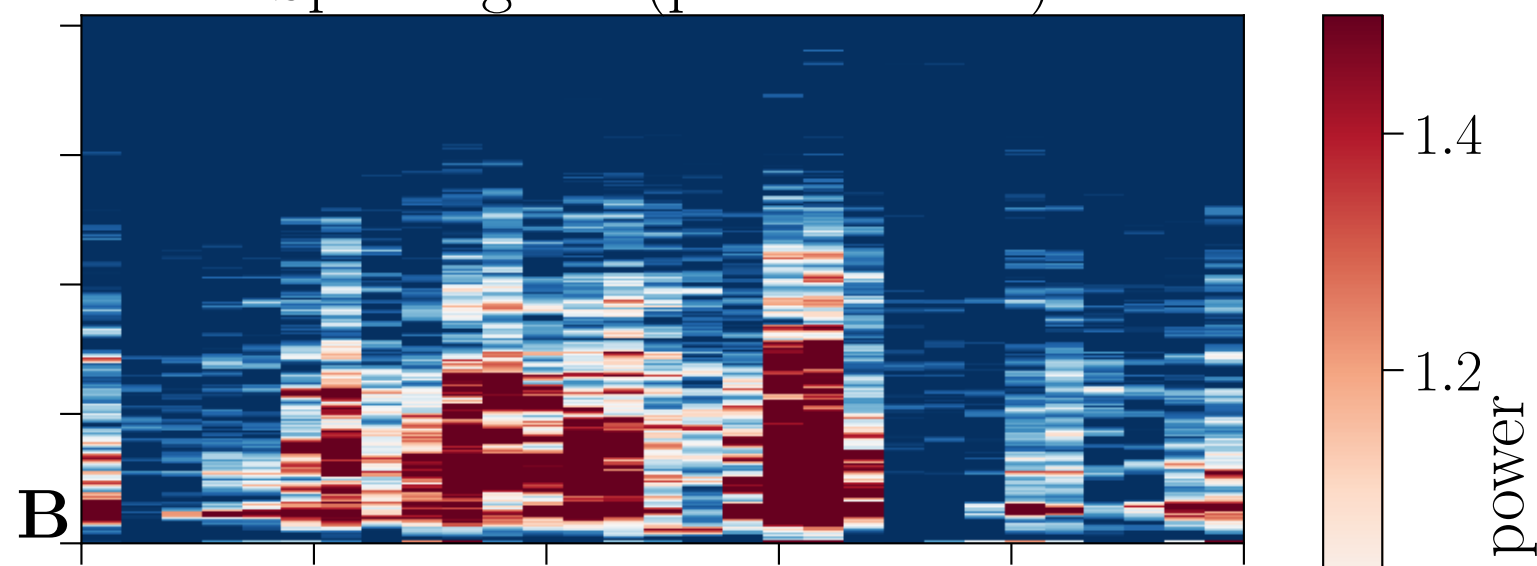

Time-frequency model (interictal state)

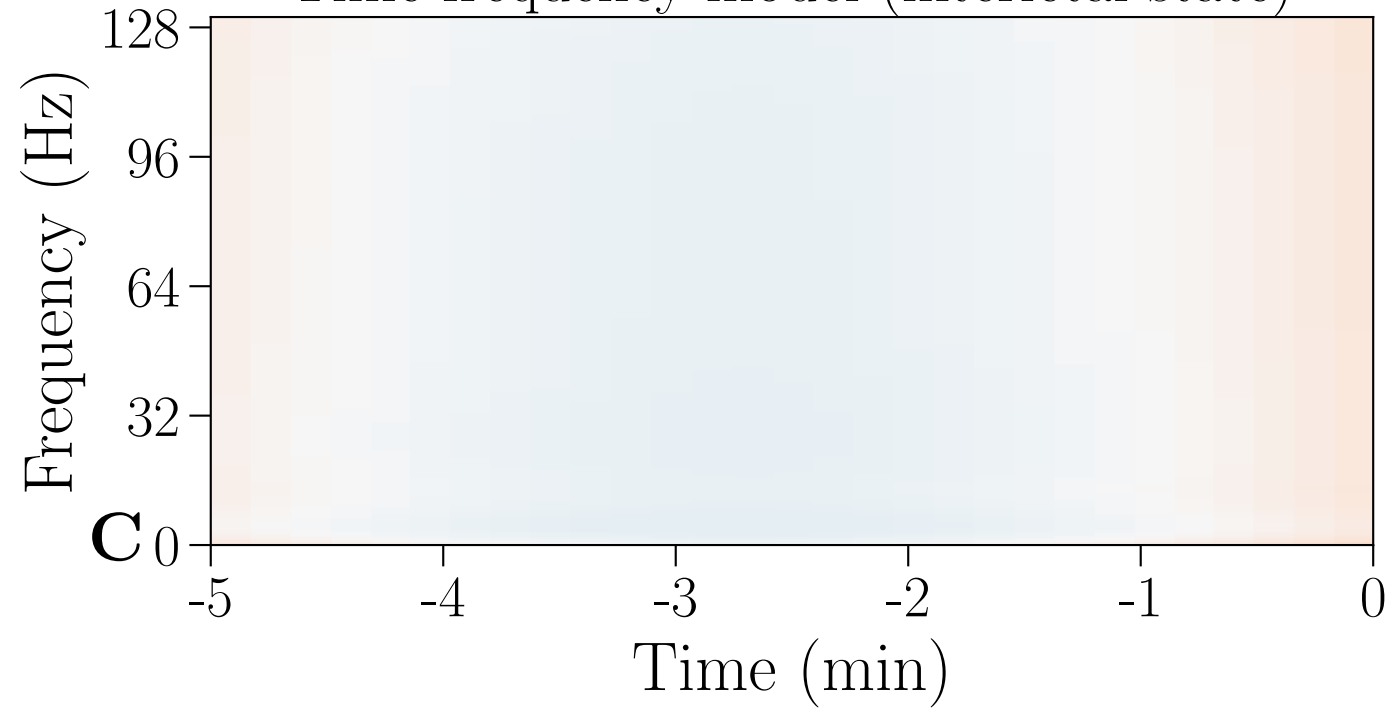

Spectrogram (interictal state)

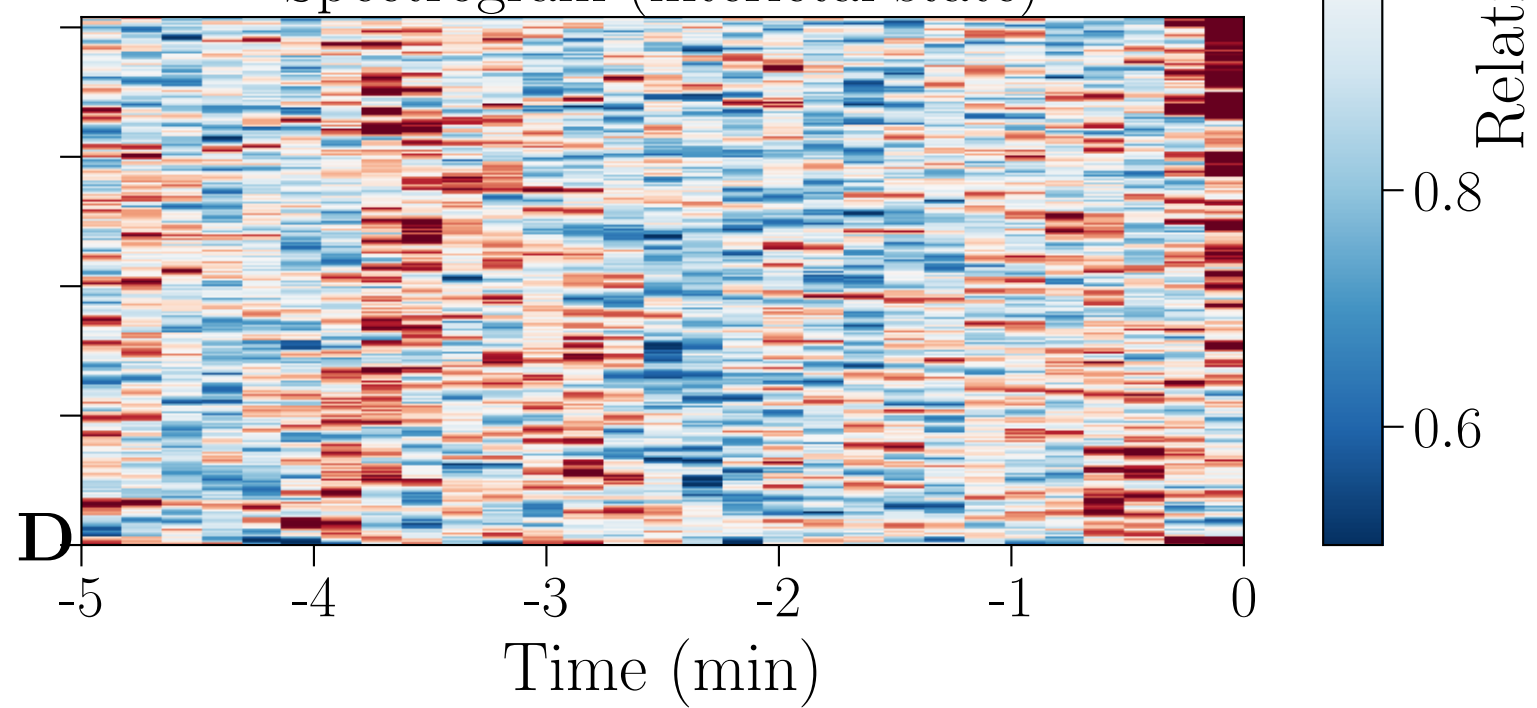

Supplement: pone.0228025.s001.pdf [file pone.0228025.s001.pdf]
