# Supplementary material for: Predicting epileptic seizures using nonnegative matrix factorization
Source: PubMed Central journal article supplement (PMC7001919; doi:10.1371/journal.pone.0228025), 2020-02-05

Patient 1

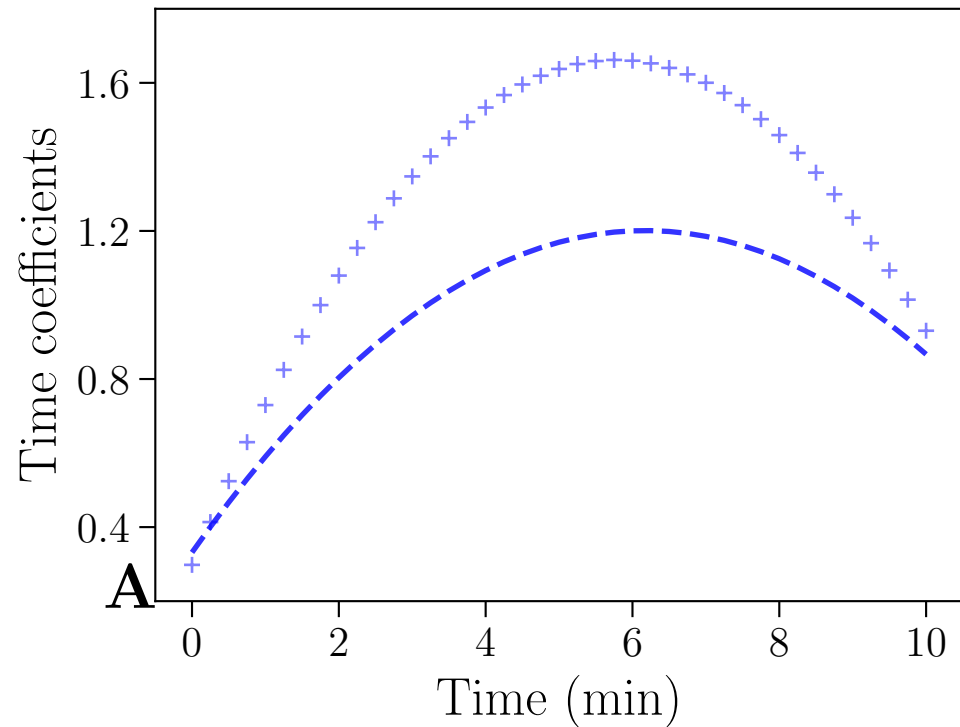

Patient 2

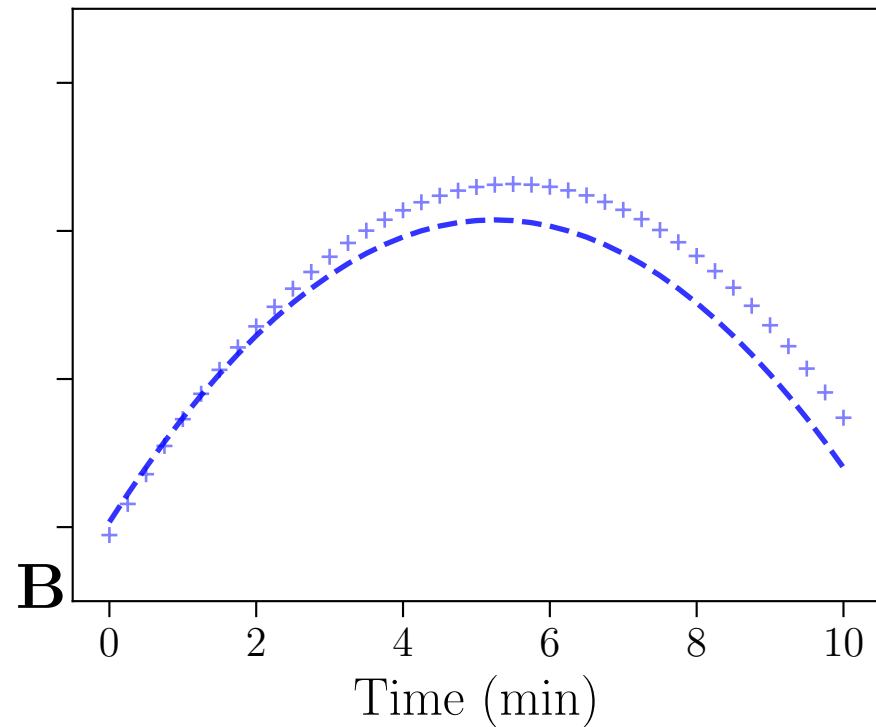

Patient 3

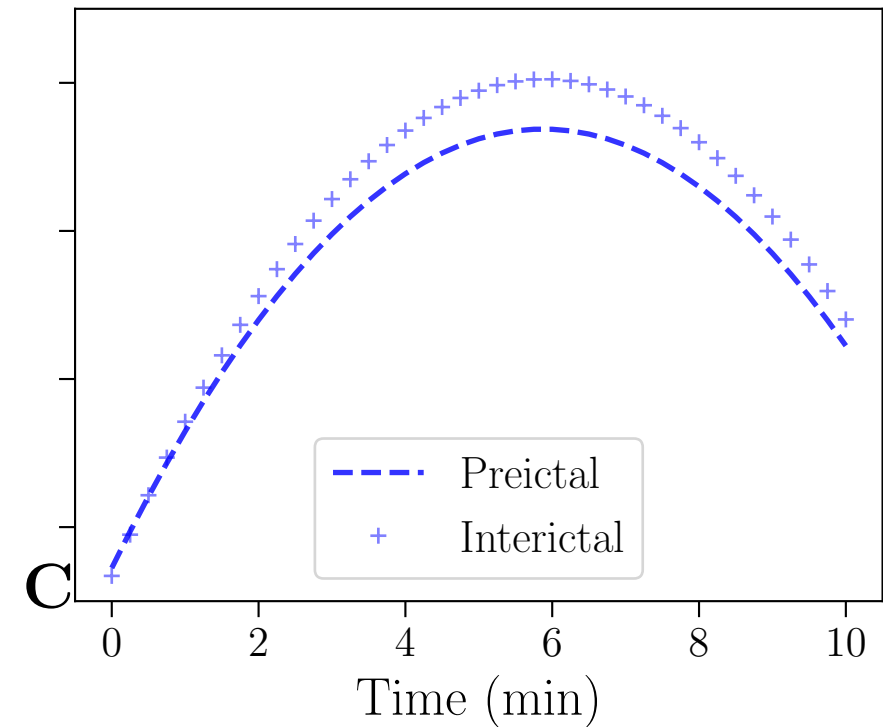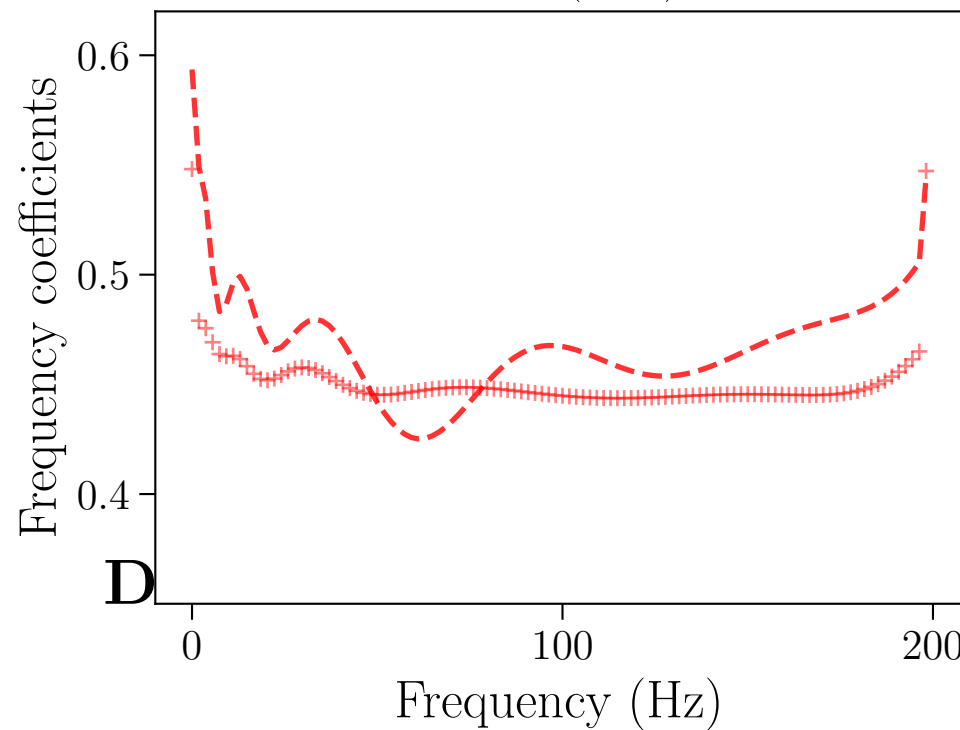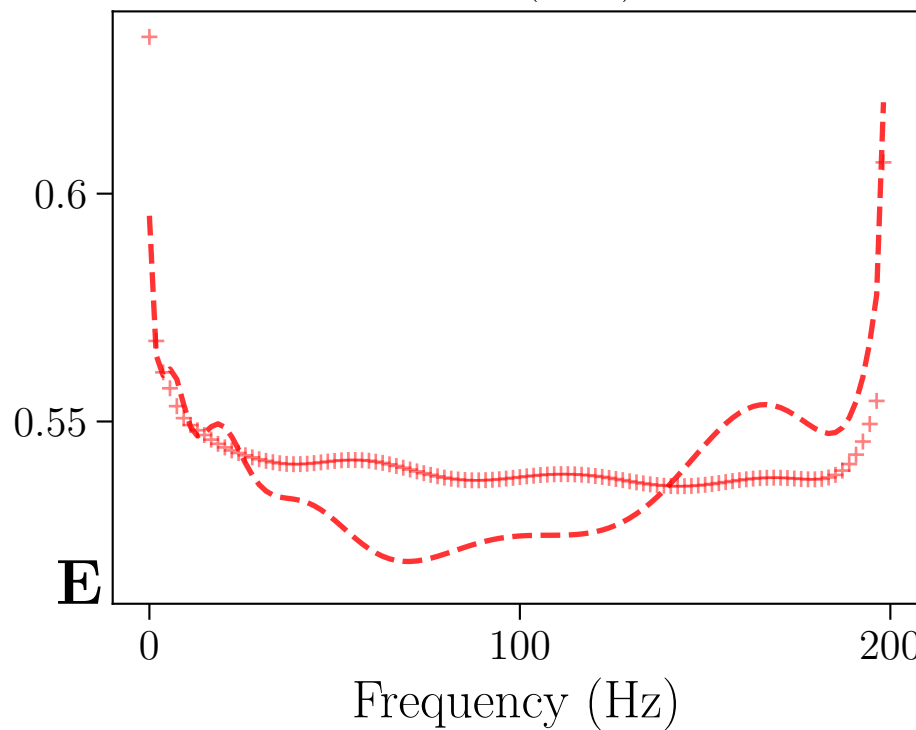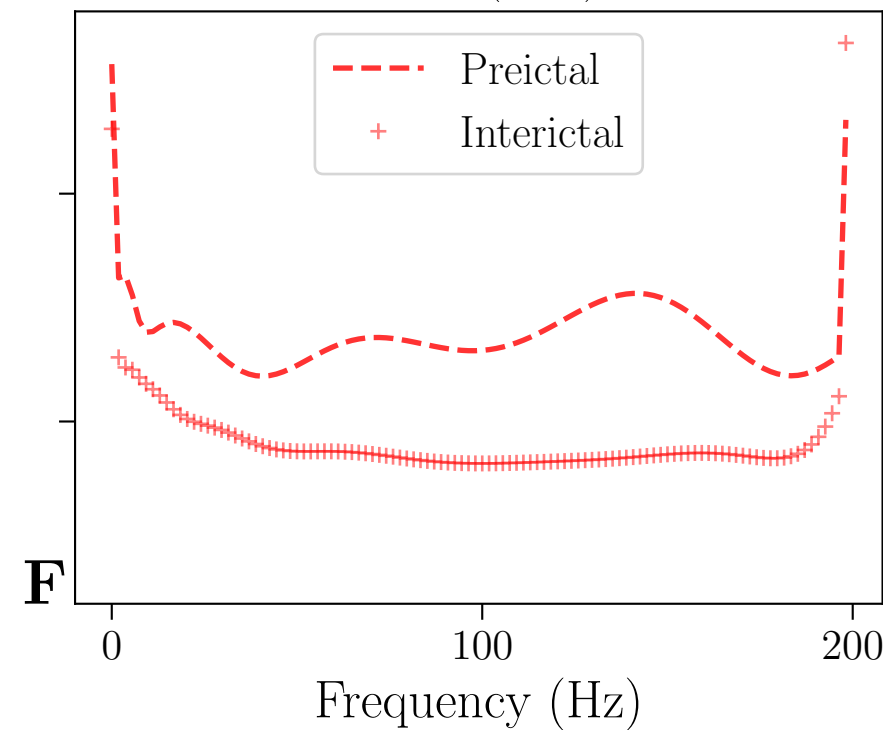

Supplement: pone.0228025.s005.pdf [file pone.0228025.s005.pdf]
